# Supplementary material
Source: Royal Society of Chemistry journal article supplement (https://www.rsc.org/suppdata/nj/1999/827/902283j.doc)
Supplement: Supplementary file 1 [file 902283j.doc]

Supplementary Material

Asymmetric Oxidations at Sulfur Catalyzed by Engineered Strains That Overexpress Cyclohexanone Monooxygenase

Margaret M. Kayser†,*, Gang Chen†, Marko D. Mihovilovic‡, Megan E. Mrstik¶, Carlos A. Martinez¶ and Jon D. Stewart¶,*

†Department of Physical Sciences, University of New Brunswick, P.O. Box 5050, Saint John, NB E2L 4L5 Canada

‡Present address: Vienna University of Technology, Institute for Organic Chemistry, Getreidemarkt 9, A-1060,Vienna, Austria

¶Department of Chemistry, University of Florida, Gainesville, FL 32611 USA. Phone (352) 846-0743, Fax (352) 846-2095, E-mail jds2@chem.ufl.edu

# *Authors to whom correspondence should be addressed

**General experimental procedures.** All reagents were obtained from commercial suppliers and were used as received.Growth media for *Escherichia coli* were obtained from Difco (Detroit, MI). Standard techniques for routine cloning were those described by Sambrook et al.1 *E. coli* XL1-Blue (Stratagene) and TOP10 (Invitrogen) were used for routine propagation of plasmid DNA. Restriction and DNA modifying enzymes were obtained from New England Biolabs (Beverly, MA) or Promega (Madison, WI). Materials for the polymerase chain reaction were obtained from Fisher Scientific. DNA oligonucleotides were synthesized by Integrated DNA Technologies (Coralville, IA) and were used without further purification.

**Construction of an *E. coli* strain that overexpresses cyclohexanone monooxygenase**. The complete CHMO gene was amplified from pJS1952 using primers CHMO For (5’-GGC GGA TCC ATC ATG TCA CAA AAA ATG GAT TTT GAT GC-3’) and MKI Rev (5’-GCC GCA TGC TTA GGC ATT GGC AGG TTG CTT GAT ATC-3’) using 30 cycles of 94°C (1 min), 52°C (2 min) and 72°C (3 min) followed by 10 min at 72°C (Supplementary Material Scheme). This amplification step corrected a 3 bp deletion in the 5’ region of the CHMO gene present in pJS195 that was discovered after our initial cloning of this gene2. The PCR product with the desired size (1.63 kilobases, kb) was purified by agarose gel electrophoresis, then the product was ligated to a commercially-available T-vector (pT7Blue-T, Novagen, Inc.) and this material was used to transform *E. coli* XL-1 Blue. Twelve colonies were chosen randomly for analysis by plasmid mini-preps and restriction mapping and one of these, designated pMEM2, appeared to have the desired structure. The sequence of the 5’ region of the CHMO gene up to the internal *Eco*RI site in pMEM2 was determined by automated fluorescence methods to verify that the 3 bp deletion had been corrected and that no errors had been introduced by the PCR step. The 5’ portion of the corrected CHMO gene was subcloned as an *Eco*RI, *Bam*HI cassette between these sites in pKR001 to create a yeast expression plasmid (pJS370) that can be used to produce native cyclohexanone monooxygenase in *S. cerevisiae*.

The full-length CHMO gene was excised from pJS370 by sequential digestion with *Bam*HI and *Xba*I, then the gene was subcloned between these sites into pBC SK(+) to give a plasmid designated pMM2. This operation placed a unique *Not*I site downstream from the 3’ end of the CHMO gene that was needed for subsequent steps. An NdeI site that overlapped the start codon of the CHMO gene was incorporated by PCR amplification of the CHMO gene from pMM2 using primers MDM CHMO For (5’-CAT ATG TCA CAA AAA ATG GAT TTT GAT GCT AT-3’) and MKI Rev for 30 cycles of 94°C (1 min), 52°C (2 min) and 72°C (3 min) followed by 10 min at 72°C. After purification of the major product using low-melt agarose, it was cloned into pCR 2.1 using the TOPO-Clone kit (Invitrogen, Inc.). Following transformation, 10 colonies were chosen randomly for analysis by restriction enzyme digestion and one, designated pMM3, possessed the desired structure.

The full-length CHMO gene was assembled in *E. coli* expression vector pET 22b(+) (Novagen, Inc.) using a three-component ligation strategy. A 0.72 kb *Nde*I, *Eco*RI fragment containing the 5’ portion of the CHMO gene excised from pMM3 was mixed with a 0.92 kb *Eco*RI, *Not*I fragment containing the 3’ portion of the CHMO gene obtained from pMM2 along with the large *Nde*I, *Not*I fragment from pET 22b(+). Following transformation, 16 colonies were chosen randomly for analysis by restriction digestion and one, designated pMM4, had the desired structure. Plasmid pMM4 was used to transform *E. coli* BL21(DE3) to create the final overexpression strain.

**Supplementary Material References:**

1 J. Sambrook, E. F. Fritsch, and T. Maniatis, ‘Molecular Cloning. A Laboratory Manual’, Cold Spring Harbor, 1989.

2 J. D. Stewart, K. W. Reed, and M. M. Kayser, *J. Chem. Soc. Perkin Trans. 1*, 1996, 755.
